# Supplementary material for: Volatile Composition and Biological Activity of Jordanian Commercial Samples of R. coriaria L. Fruits
Source: MDPI journal article supplement (doi:10.3390/molecules26185691), 2021-09-20
Supplement: s1 [file s1]

# Supplementary Materials

**Table S1.** Volatile composition of *R. coriaria* fruits (Sumac samples 1-8) purchased from the Jordanian market and agriculture field.

| N° | Class | Compound                                | LRI <sup>a</sup> | Samples (relative content, %) <sup>#</sup> |             |             |            |             |             |             |             |
|----|-------|-----------------------------------------|------------------|--------------------------------------------|-------------|-------------|------------|-------------|-------------|-------------|-------------|
|    |       |                                         |                  | 1                                          | 2           | 3           | 4          | 5           | 6           | 7           | 8           |
| 1  | nt    | Hexanal                                 | 806              | -                                          | 0.7         | 0.1         | 0.3        | 0.3         | 1.0         | 0.2         | 1.3         |
| 2  | nt    | ( <i>E</i> )-2-Hexenal                  | 854              | -                                          | 0.1         | -           | -          | -           | -           | -           | -           |
| 3  | nt    | Heptanal                                | 901              | -                                          | 0.2         | -           | -          | -           | 0.1         | -           | -           |
| 4  | mh    | Tricyclene                              | 930              | -                                          | 0.2         | -           | -          | -           | -           | -           | -           |
| 5  | mh    | <b><math>\alpha</math>-Pinene</b>       | <b>939</b>       | -                                          | <b>42.2</b> | <b>22.2</b> | <b>8.2</b> | <b>20.1</b> | <b>10.4</b> | <b>11.0</b> | <b>40.8</b> |
| 6  | mh    | Camphene                                | 953              | -                                          | 2.0         | 0.7         | 1.0        | 0.7         | 0.8         | 1.0         | 0.5         |
| 7  | nt    | ( <i>Z</i> )-2-Heptenal                 | 960              | -                                          | 0.6         | -           | -          | 0.3         | 0.4         | -           | 0.3         |
| 8  | mh    | $\beta$ -Pinene                         | 980              | -                                          | 3.9         | 1.3         | 0.3        | 1.1         | 0.8         | 0.2         | 2.8         |
| 9  | nt    | 1-Octen-3-ol                            | 982              | -                                          | -           | -           | 0.3        | -           | -           | 0.5         | -           |
| 10 | nt    | 6-Methyl-5-hepten-2-one                 | 988              | -                                          | 1.2         | 0.3         | 0.5        | 0.8         | 1.2         | 0.5         | 0.8         |
| 11 | mh    | Myrcene                                 | 991              | -                                          | 2.8         | 1.3         | 1.6        | 1.9         | -           | 1.9         | 1.9         |
| 12 | nt    | 2-Pentyl furan                          | 993              | -                                          | -           | -           | -          | -           | 4.1         | -           | -           |
| 13 | nt    | Octanal                                 | 1002             | -                                          | 1.0         | -           | 1.1        | 0.8         | -           | -           | -           |
| 14 | mh    | $\alpha$ -Phellandrene                  | 1005             | -                                          | -           | 0.7         | -          | -           | -           | 0.9         | 0.5         |
| 15 | nt    | Butyl pivalate                          | 1007             | -                                          | -           | -           | -          | -           | 0.7         | -           | -           |
| 16 | mh    | $\delta$ -3-Carene                      | 1011             | -                                          | -           | 0.2         | 0.5        | -           | -           | 0.4         | -           |
| 17 | mh    | $\alpha$ -Terpinene                     | 1018             | -                                          | 0.5         | 0.5         | 2.4        | 0.5         | -           | 3.0         | 0.2         |
| 18 | nt    | ( <i>E</i> )-2-Hexenyl acetate          | 1020             | -                                          | -           | -           | -          | -           | 1.2         | -           | -           |
| 19 | mh    | <i>p</i> -Cymene                        | 1027             | -                                          | 0.5         | 0.6         | 5.8        | 0.4         | 1.2         | 8.5         | 0.4         |
| 20 | mh    | Limonene                                | 1031             | -                                          | 8.8         | 4.4         | 4.9        | 5.9         | 3.8         | 5.1         | 7.6         |
| 21 | om    | 1,8-Cineole                             | 1035             | 5.2                                        | -           | 2.6         | 10.4       | -           | 2.6         | 5.1         | -           |
| 22 | mh    | ( <i>Z</i> )- $\beta$ -Ocimene          | 1040             | -                                          | 2.4         | 0.4         | 0.3        | 0.9         | 0.2         | 1.0         | 1.9         |
| 23 | mh    | ( <i>E</i> )- $\beta$ -Ocimene          | 1050             | -                                          | 3.8         | 0.7         | 0.5        | 1.3         | 0.5         | 1.2         | 2.0         |
| 24 | mh    | $\gamma$ -Terpinene                     | 1062             | -                                          | 0.5         | 1.0         | 5.5        | 1.0         | 1.0         | 8.0         | 0.8         |
| 25 | nt    | ( <i>E</i> )-2-Octenal                  | 1063             | -                                          | 0.6         | -           | -          | -           | 1.0         | -           | -           |
| 26 | om    | <i>trans</i> -Linalool oxide (furanoid) | 1076             | -                                          | 0.6         | 0.4         | 0.9        | 1.3         | 0.9         | 0.5         | 0.2         |
| 27 | mh    | Terpinolene                             | 1088             | -                                          | 0.6         | 0.6         | 1.5        | 0.9         | 1.0         | 1.3         | 0.2         |
| 28 | nt    | Undecane                                | 1099             | -                                          | -           | -           | -          | -           | -           | 0.5         | -           |
| 29 | om    | Linalool                                | 1100             | -                                          | -           | -           | 0.2        | -           | 1.0         | -           | 0.2         |
| 30 | nt    | Nonanal                                 | 1103             | 10.6                                       | 2.0         | 2.4         | 4.7        | 2.2         | 4.1         | 3.0         | 1.7         |
| 31 | nt    | Isopentyl 2-methyl butanoate            | 1105             | -                                          | 0.3         | 0.2         | -          | -           | -           | -           | 0.1         |
| 32 | om    | <i>exo</i> -Fenchol                     | 1117             | -                                          | -           | 0.4         | 0.6        | -           | -           | 0.2         | -           |
| 33 | om    | Terpinen-1-ol                           | 1138             | -                                          | -           | -           | 0.1        | -           | -           | -           | -           |
| 34 | om    | <i>trans</i> -Pinocarveol               | 1140             | -                                          | -           | -           | -          | -           | -           | -           | 0.3         |
| 35 | om    | Camphor                                 | 1145             | -                                          | 0.2         | 0.2         | 0.4        | -           | 0.9         | 0.3         | -           |
| 36 | om    | Menthone                                | 1154             | -                                          | -           | -           | -          | 1.1         | -           | -           | -           |
| 37 | om    | Isoborneol                              | 1156             | -                                          | 6.1         | 0.5         | 2.3        | 3.5         | 5.9         | 3.2         | -           |
| 38 | om    | Pinocarvone                             | 1164             | -                                          | -           | -           | -          | -           | -           | -           | 0.5         |
| 39 | om    | Borneol                                 | 1166             | -                                          | 0.1         | 0.6         | 0.8        | -           | 0.3         | 0.6         | 0.1         |
| 40 | om    | Menthol                                 | 1173             | -                                          | -           | 0.1         | -          | 2.5         | -           | -           | 0.2         |
| 41 | om    | 4-Terpineol                             | 1180             | -                                          | 0.2         | 1.2         | 1.6        | 0.4         | 0.9         | 1.1         | 0.1         |
| 42 | om    | $\alpha$ -Terpineol                     | 1190             | 1.9                                        | 0.6         | 1.8         | 1.9        | 1.1         | 1.9         | 1.5         | 0.2         |
| 43 | pp    | Methyl chavicol                         | 1197             | -                                          | -           | -           | -          | -           | 2.8         | -           | -           |
| 44 | ac-10 | Safranal                                | 1999             | -                                          | 0.2         | 1.1         | 1.2        | -           | -           | -           | -           |
| 45 | nt    | Decanal                                 | 1205             | 5.7                                        | 0.5         | 1.2         | 0.8        | 0.6         | 1.0         | 0.5         | 0.5         |
| 46 | om    | Cumin aldehyde                          | 1240             | -                                          | 0.3         | 0.9         | 1.1        | -           | 1.8         | 1.1         | -           |
| 47 | om    | Carvone                                 | 1245             | -                                          | 0.4         | 2.9         | 2.6        | 0.2         | 4.1         | 2.1         | -           |
| 48 | om    | Thymoquinone                            | 1250             | -                                          | -           | -           | -          | -           | 0.8         | -           | -           |
| 49 | om    | Linalyl acetate                         | 1258             | -                                          | 0.3         | 0.5         | -          | 0.3         | 0.1         | -           | 0.8         |
| 50 | nt    | ( <i>E</i> )-2-Decenal                  | 1263             | -                                          | 0.3         | -           | -          | 0.6         | 0.9         | 0.2         | 0.3         |

|                             |       |                                         |             |             |             |             |             |             |             |             |             |
|-----------------------------|-------|-----------------------------------------|-------------|-------------|-------------|-------------|-------------|-------------|-------------|-------------|-------------|
| 51                          | om    | Isobornyl acetate                       | 1286        | -           | 0.5         | 0.6         | 0.4         | 0.2         | 0.7         | 0.4         | 0.3         |
| 52                          | pp    | ( <i>E</i> )-Anethole                   | 1290        | -           | -           | 0.4         | -           | 10.1        | 1.1         | 0.6         | -           |
| 53                          | nt    | Tridecane                               | 1299        | 1.7         | 0.1         | 0.2         | 0.2         | -           | 0.1         | -           | -           |
| 54                          | om    | 4-Terpinyl acetate                      | 1300        | -           | -           | -           | -           | -           | -           | -           | 0.1         |
| 55                          | om    | Carvacrol                               | 1302        | -           | -           | -           | -           | -           | 0.5         | 1.2         | -           |
| 56                          | nt    | Undecanal                               | 1312        | 2.5         | -           | -           | -           | -           | -           | -           | -           |
| 57                          | nt    | 4-Vinyl guaiaicol                       | 1315        | -           | -           | -           | -           | -           | 0.4         | -           | -           |
| 58                          | om    | $\alpha$ -Terpinyl acetate              | 1350        | 8.0         | 0.8         | 2.0         | 1.0         | 0.3         | 1.0         | 0.6         | 0.3         |
| 59                          | pp    | Eugenol                                 | 1360        | -           | -           | -           | -           | -           | 0.6         | -           | -           |
| 60                          | sh    | $\alpha$ -Ylangene                      | 1372        | -           | 0.1         | 0.2         | 0.3         | -           | -           | 0.2         | 0.5         |
| 61                          | sh    | $\alpha$ -Copaene                       | 1376        | -           | 0.5         | 1.0         | 0.8         | 0.4         | 0.5         | 0.5         | 1.3         |
| 62                          | nt    | Tetradecane                             | 1399        | 3.8         | 0.3         | 0.5         | 1.8         | -           | 0.4         | 0.2         | 0.5         |
| 63                          | sh    | Isocaryophyllene                        | 1404        | -           | 0.3         | 0.3         | 0.7         | 0.4         | 1.0         | 0.3         | 0.1         |
| 64                          | nt    | Dodecanal                               | 1408        | 5.2         | -           | -           | -           | -           | -           | -           | -           |
| 65                          | sh    | $\beta$ -Ylangene                       | 1414        | -           | 0.8         | 0.2         | 0.9         | -           | -           | -           | -           |
| 66                          | os    | <4,8- $\alpha$ -epoxy> Caryophyllene    | 1417        | -           | -           | 0.2         | 0.6         | -           | -           | -           | -           |
| 67                          | sh    | <b><math>\beta</math>-Caryophyllene</b> | <b>1418</b> | <b>34.6</b> | <b>7.9</b>  | <b>32.1</b> | <b>21.1</b> | <b>28.4</b> | <b>19.7</b> | <b>18.5</b> | <b>19.6</b> |
| 68                          | sh    | $\beta$ -Deprezianene                   | 1423        | -           | -           | -           | -           | -           | -           | 0.9         | -           |
| 69                          | sh    | $\gamma$ -Elemene                       | 1433        | -           | 0.2         | 0.8         | 0.3         | 0.6         | 0.5         | 0.4         | 0.6         |
| 70                          | sh    | $\beta$ -Gurjunene                      | 1435        | -           | -           | -           | -           | -           | 0.7         | -           | -           |
| 71                          | sh    | $\alpha$ -Guaiene                       | 1442        | -           | -           | -           | -           | -           | 0.2         | -           | -           |
| 72                          | sh    | $\alpha$ -Himachalene                   | 1448        | -           | 0.3         | 0.5         | 0.6         | -           | 2.0         | 0.5         | 0.1         |
| 73                          | ac-12 | ( <i>E</i> )-Geranyl acetone            | 1454        | 2.9         | -           | -           | 0.2         | 0.6         | 0.6         | 0.6         | 0.7         |
| 74                          | sh    | $\alpha$ -Humulene                      | 1455        | 1.2         | 0.6         | 2.1         | 1.4         | 2.2         | 1.8         | 1.3         | 1.1         |
| 75                          | sh    | ( <i>E</i> )- $\beta$ -Farnesene        | 1458        | -           | 0.2         | -           | 0.3         | -           | -           | -           | -           |
| 76                          | nt    | Dodecanol                               | 1471        | 6.9         | -           | -           | -           | -           | -           | -           | -           |
| 77                          | sh    | $\gamma$ -Muurolene                     | 1477        | 0.2         | 0.3         | 0.7         | 0.6         | -           | 0.5         | 0.4         | -           |
| 78                          | sh    | $\alpha$ -Amorphene                     | 1480        | -           | -           | -           | -           | 0.1         | -           | -           | 0.3         |
| 79                          | sh    | $\beta$ -Selinene                       | 1485        | -           | 0.2         | 0.4         | 0.5         | -           | 0.4         | 0.1         | 0.3         |
| 80                          | sh    | Viridiflorene                           | 1493        | -           | -           | 0.5         | 0.6         | -           | -           | 0.5         | 0.5         |
| 81                          | sh    | <i>cis</i> - $\beta$ -Guaiene           | 1494        | -           | -           | -           | -           | -           | 0.2         | -           | -           |
| 82                          | sh    | $\alpha$ -Muurolene                     | 1499        | -           | -           | 0.4         | 0.1         | 1.1         | -           | 0.6         | 1.1         |
| 83                          | nt    | Pentadecane                             | 1500        | 4.3         | -           | -           | -           | -           | -           | -           | -           |
| 84                          | sh    | $\beta$ -Bisabolene                     | 1509        | -           | -           | -           | 0.2         | -           | 0.2         | 0.1         | -           |
| 85                          | sh    | <i>trans</i> - $\gamma$ -Cadinene       | 1513        | -           | -           | 0.7         | -           | 0.5         | -           | -           | 0.7         |
| 86                          | sh    | $\delta$ -Cadinene                      | 1523        | 2.4         | 0.4         | 1.1         | 0.7         | 0.7         | 0.5         | 0.6         | 1.4         |
| 87                          | sh    | $\alpha$ -Cadinene                      | 1538        | -           | -           | -           | -           | -           | -           | -           | 0.2         |
| 88                          | sh    | Selina-3,7(11)- diene                   | 1542        | -           | -           | 0.2         | -           | -           | -           | -           | -           |
| 89                          | os    | Elemol                                  | 1550        | -           | -           | -           | -           | 0.3         | -           | 0.4         | 0.3         |
| 90                          | os    | Caryophyllene alcohol                   | 1570        | -           | -           | 0.2         | 0.2         | -           | 0.3         | 0.2         | -           |
| 91                          | os    | Caryophyllene oxide                     | 1581        | -           | -           | -           | -           | -           | -           | -           | 0.6         |
| 92                          | nt    | Hexadecene                              | 1590        | -           | -           | 0.8         | 0.3         | -           | -           | 0.2         | -           |
| 93                          | nt    | Hexadecane                              | 1600        | -           | 0.3         | 0.2         | 0.2         | -           | -           | -           | 0.5         |
| 94                          | sh    | Cadalene                                | 1674        | -           | -           | -           | 0.3         | -           | 0.3         | 0.2         | 0.2         |
| 95                          | nt    | Isoamyl dodecanoate                     | 1830        | -           | -           | -           | -           | -           | -           | 0.2         | -           |
| <b>Total identified (%)</b> |       |                                         |             | <b>97.2</b> | <b>98.5</b> | <b>98.3</b> | <b>98.6</b> | <b>97.1</b> | <b>93.4</b> | <b>94.6</b> | <b>98.5</b> |

  

| Samples                     |                                  | 1           | 2           | 3           | 4           | 5           | 6           | 7           | 8           |
|-----------------------------|----------------------------------|-------------|-------------|-------------|-------------|-------------|-------------|-------------|-------------|
| Class of compounds          |                                  |             |             |             |             |             |             |             |             |
| mh                          | monoterpene hydrocarbons (mh)    | -           | 62.8        | 34.6        | 32.5        | 34.7        | 19.7        | 43.5        | 59.6        |
| om                          | oxygenated monoterpenes (om)     | 15.1        | 10.1        | 14.7        | 24.3        | 10.9        | 23.4        | 17.9        | 3.3         |
| <b>Total monoterpenes</b>   |                                  | <b>15.1</b> | <b>72.9</b> | <b>49.3</b> | <b>56.8</b> | <b>45.6</b> | <b>43.1</b> | <b>61.4</b> | <b>62.9</b> |
| sh                          | sesquiterpenes hydrocarbons (sh) | 38.5        | 11.8        | 41.2        | 29.4        | 35.5        | 28.3        | 25.1        | 28.0        |
| os                          | oxygenated sesquiterpenes (os)   | -           | -           | 0.4         | 0.8         | 0.3         | 0.3         | 0.6         | 0.9         |
| <b>Total sesquiterpenes</b> |                                  | <b>38.5</b> | <b>11.8</b> | <b>41.6</b> | <b>30.2</b> | <b>35.8</b> | <b>28.6</b> | <b>25.7</b> | <b>28.9</b> |
| ac-10                       | apocarotenoids (ac-10)           | -           | 0.2         | 1.1         | 1.2         | -           | -           | -           | -           |
| ac-12                       | apocarotenoids (ac-12)           | 2.9         | -           | -           | 0.2         | -           | 0.6         | 0.6         | 0.7         |
| nt                          | non terpenes (nt)                | 40.7        | 8.2         | 5.9         | 10.2        | 5.6         | 16.6        | 6.3         | 6.0         |

|                             |                       |             |             |             |             |             |             |             |             |
|-----------------------------|-----------------------|-------------|-------------|-------------|-------------|-------------|-------------|-------------|-------------|
| pp                          | phenylpropanoids (pp) | -           | -           | 0.4         | -           | 10.1        | 4.5         | 0.6         | -           |
| <b>Total identified (%)</b> |                       | <b>97.2</b> | <b>98.5</b> | <b>98.3</b> | <b>98.6</b> | <b>97.1</b> | <b>93.4</b> | <b>94.6</b> | <b>98.5</b> |

<sup>a</sup>LRI: Linear Retention Index on a DB5 column, <sup>#</sup>Samples of Sumac were collected from the different location and local market from Jordan. Sample 1 (Amman, Downtown), Sample 3 (Amman City), sample 4 (city Mall), Sample 5 (Al-Fuheis) and Sample 8 (Al-salt City). Sample 2 (Ajloun Forest Reserve), Sample 6 (Al-salt field) and Sample 7 (Al-Fuheis field).

**Table S2.** GC-MS analysis of Essential oil of *R. coriaria* fruits (Sumac samples 1-8) purchased from the Jordanian market and agriculture field.

|                  |       |                                         |                  | Samples (relative content, %) <sup>#</sup> |      |      |      |      |      |      |      |
|------------------|-------|-----------------------------------------|------------------|--------------------------------------------|------|------|------|------|------|------|------|
|                  |       |                                         |                  | EO-1                                       | EO-2 | EO-3 | EO-4 | EO-5 | EO-6 | EO-7 | EO-8 |
| EO Yield (% w/w) |       |                                         |                  | 0.22                                       | 0.31 | 0.2  | 0.25 | 0.19 | 0.21 | 0.25 | 0.18 |
| N°               | Class | Compound                                | LRI <sup>a</sup> |                                            |      |      |      |      |      |      |      |
| 1                | nt    | Furfural                                | 820              | 46.7                                       | 14.8 | 48.1 | 14.1 | 4.9  | 30.3 | 18.1 | 22.2 |
| 2                | nt    | (E)-2-Hexenal                           | 854              | 0.2                                        | -    | -    | -    | -    | 0.1  | -    | -    |
| 3                | nt    | 5-methyl-2(3H)-Furanone                 | 864              | 0.3                                        | -    | 0.1  | -    | -    | 0.2  | -    | 0.2  |
| 4                | nt    | 2-Heptanone                             | 890              | 0.1                                        | -    | -    | -    | -    | -    | -    | -    |
| 5                | nt    | Cyclohexanecarboxaldehyde               | 896              | 0.2                                        | -    | -    | 0.1  | -    | -    | -    | -    |
| 6                | nt    | 4-Nonene                                | 897              | -                                          | -    | -    | -    | -    | 0.1  | -    | -    |
| 7                | nt    | Heptanal                                | 901              | 0.2                                        | -    | 0.2  | 0.1  | 0.1  | 0.1  | -    | 0.2  |
| 8                | mh    | $\alpha$ -Pinene                        | 939              | -                                          | -    | 0.1  | -    | -    | -    | -    | 0.1  |
| 9                | nt    | 1-ethyl-1-methyl-Cyclopentane           | 944              | 0.2                                        | -    | -    | -    | -    | -    | -    | -    |
| 10               | nt    | 3-propyl-cyclopentene                   | 953              | -                                          | -    | -    | -    | -    | -    | -    | -    |
| 11               | nt    | (E)-2-Heptenal                          | 955              | 5.1                                        | 0.1  | 1.3  | 0.1  | 0.1  | 1.4  | 0.1  | 0.4  |
| 12               | nt    | 5-methyl-2-Furancarboxaldehyde          | 959              | 0.7                                        | 0.1  | 0.9  | 0.1  | 0    | 0.3  | 0.5  | 0.8  |
| 13               | nt    | Benzaldehyde                            | 962              | 0.8                                        | 0.2  | 1.1  | 0.2  | 0.2  | 0.3  | 0.2  | 0.1  |
| 14               | nt    | Hexanoic acid                           | 970              | 0.6                                        | 0.8  | 0.9  | 0.5  | 0.6  | 0.5  | 0.1  | -    |
| 15               | nt    | 1-Hepten-3-one                          | 976              | 0.2                                        | -    | 0.1  | -    | -    | 0.1  | -    | -    |
| 16               | nt    | 1-Octen-3-ol                            | 978              | 2.2                                        | 0.6  | 1.1  | 0.7  | 0.7  | 0.8  | -    | -    |
| 17               | nt    | 6-methyl-5-Hepten-2-one                 | 985              | -                                          | -    | -    | -    | -    | -    | -    | 0.1  |
| 18               | mh    | Myrcene                                 | 991              | -                                          | -    | 0.1  | -    | -    | -    | -    | -    |
| 19               | nt    | Mesitylene                              | 995              | -                                          | -    | 0.1  | -    | -    | -    | -    | -    |
| 20               | nt    | 2-methyl-1,5-Hexadiene                  | 997              | 0.1                                        | -    | -    | -    | -    | -    | -    | -    |
| 21               | nt    | Decane                                  | 998              | -                                          | -    | -    | -    | -    | -    | -    | 0.1  |
| 22               | nt    | Octanal                                 | 1002             | 0.2                                        | 0.1  | 0.3  | 0.1  | 0.1  | 0.2  | 0.1  | 0.3  |
| 23               | mh    | $\alpha$ -Phellandrene                  | 1005             | -                                          | -    | 0.2  | -    | -    | -    | -    | -    |
| 24               | mh    | $\delta$ -3-Carene                      | 1011             | 0.2                                        | -    | 0.9  | -    | -    | -    | -    | -    |
| 25               | mh    | $\alpha$ -Terpinene                     | 1018             | -                                          | 0.1  | -    | -    | 0.1  | -    | -    | 0.2  |
| 26               | mh    | <i>p</i> -Cymene                        | 1027             | -                                          | -    | 0.1  | -    | -    | 0.1  | -    | -    |
| 27               | mh    | Limonene                                | 1031             | -                                          | 0.1  | 1.1  | -    | -    | 0.2  | 0.1  | 0.4  |
| 28               | om    | 1,8-Cineole                             | 1035             | 0.1                                        | 0.3  | 0.6  | 0.3  | 0.4  | 0.4  | 0.2  | 0.2  |
| 29               | nt    | 3-Octen-2-one                           | 1036             | 0.1                                        | 0    | 0.1  | -    | -    | -    | -    | -    |
| 30               | nt    | Phenylacetaldehyde                      | 1044             | 0.1                                        | 0.1  | 0.8  | 0.1  | 0.2  | 0.4  | 0.3  | 0.4  |
| 31               | nt    | (E)-2-Octenal                           | 1057             | 1.1                                        | 0.1  | 0.3  | 0.1  | -    | 0.5  | -    | -    |
| 32               | nt    | 1-Chloro-Octane                         | 1061             | -                                          | -    | -    | -    | -    | 0.1  | -    | -    |
| 33               | nt    | Cyclooctyl alcohol                      | 1065             | 1.1                                        | 0.1  | 0.3  | -    | 0.1  | 0.1  | -    | -    |
| 34               | nt    | Heptanoic acid                          | 1067             | -                                          | 0.3  | -    | 0.1  | 0.3  | -    | -    | 0.1  |
| 35               | nt    | 1-Octanol                               | 1069             | 0.2                                        | -    | -    | -    | -    | -    | -    | -    |
| 36               | om    | <i>cis</i> -Linalool oxide (furanoid)   | 1070             | 0.4                                        | 0.2  | -    | 0.2  | 0.3  | -    | 0.1  | 0.2  |
| 37               | nt    | 3-Cyclohexene-1-methanol                | 1073             | 0.1                                        | -    | -    | -    | -    | 0.1  | -    | -    |
| 38               | om    | <i>trans</i> -Linalool oxide (furanoid) | 1076             | 0.2                                        | 0.1  | 0.3  | -    | -    | 0.5  | -    | 0.1  |
| 39               | mh    | Terpinolene                             | 1088             | -                                          | -    | -    | -    | -    | -    | 0.2  | 0.3  |
| 40               | om    | Fenchone                                | 1091             | 0.1                                        | -    | -    | -    | -    | -    | -    | -    |
| 41               | om    | Linalool                                | 1100             | 0.6                                        | -    | 0.1  | -    | -    | 0.1  | 0.1  | 0.2  |
| 42               | nt    | Nonanal                                 | 1103             | 0.4                                        | 0.5  | 0.9  | 0.4  | 0.5  | 0.5  | 6.9  | 6.8  |
| 43               | nt    | 2-Ethyl-hexanoic acid                   | 1110             | -                                          | 0.1  | -    | -    | -    | -    | -    | -    |
| 44               | om    | <i>allo</i> -Ocimene                    | 1129             | -                                          | 0.1  | -    | -    | -    | -    | -    | 0.2  |
| 45               | sh    | Pinocarveol                             | 1134             | -                                          | -    | -    | -    | -    | -    | -    | 0.1  |
| 46               | om    | Terpinen-1-ol                           | 1138             | -                                          | 0.1  | -    | 0.1  | 0.1  | -    | -    | 0.2  |
| 47               | om    | Camphor                                 | 1145             | -                                          | 0.1  | -    | 0.1  | 0.1  | 0.1  | -    | -    |
| 48               | om    | Menthone                                | 1154             | 0.1                                        | -    | -    | -    | -    | -    | -    | -    |
| 49               | nt    | (E)-2-Nonenal                           | 1159             | 0.3                                        | -    | -    | -    | 0.1  | 0.1  | 0.2  | 0.3  |
| 50               | nt    | Octanoic acid                           | 1165             | 0.3                                        | 1.4  | -    | 1.4  | 1.5  | 0.5  | 0.3  | 0.7  |
| 51               | om    | Borneol                                 | 1166             | 0.2                                        | -    | 0.6  | -    | -    | -    | -    | 0.2  |
| 52               | nt    | Methyl 2-hydroxydodecanoate             | 1169             | 0.1                                        | -    | -    | -    | -    | -    | -    | -    |

|     |       |                                            |             |            |            |            |            |             |            |             |            |
|-----|-------|--------------------------------------------|-------------|------------|------------|------------|------------|-------------|------------|-------------|------------|
| 53  | nt    | 1-Nonanol                                  | 1171        | -          | 0.1        | -          | 0.1        | 0.1         | -          | 0.2         | -          |
| 54  | om    | Menthol                                    | 1173        | -          | -          | -          | 0.2        | -           | -          | -           | -          |
| 55  | om    | 4-Terpineol                                | 1180        | 0.6        | 0.5        | 0.2        | 0.7        | 0.7         | 0.5        | 0.2         | -          |
| 56  | om??  | p-Cymen-8-ol                               | 1188        | 0.1        | -          | -          | -          | -           | -          | -           | -          |
| 57  | om    | <b><math>\alpha</math>-Terpineol</b>       | <b>1190</b> | <b>1.8</b> | <b>1.4</b> | <b>1.4</b> | <b>1.6</b> | <b>1.9</b>  | <b>1.5</b> | <b>3.0</b>  | <b>2.4</b> |
| 58  | om    | (+) Dihydrocarvone                         | 1199        | 0.3        | 0.4        | -          | 0.4        | 0.6         | 0.4        | -           | -          |
| 59  | om    | $\gamma$ -Terpineol                        | 1201        | -          | 0.1        | -          | 0.1        | -           | -          | -           | -          |
| 60  | nt    | Decanal                                    | 1205        | -          | 0.1        | -          | -          | -           | -          | 0.2         | 0.2        |
| 61  | nt    | Octyl acetate                              | 1208        | -          | -          | -          | -          | -           | -          | -           | -          |
| 62  | nt    | (E,E)-2,4-Nonadienal                       | 1216        | 0.2        | -          | -          | -          | -           | -          | -           | 0.1        |
| 63  | om    | Pulegone                                   | 1240        | -          | 0.1        | -          | -          | -           | -          | -           | -          |
| 64  | om    | <b>Carvone</b>                             | <b>1245</b> | <b>3.6</b> | <b>7.2</b> | <b>1.8</b> | <b>7.8</b> | <b>9.1</b>  | <b>5.1</b> | <b>3.8</b>  | <b>3.2</b> |
| 65  | nt    | Phenylethyl acetate                        | 1254        | -          | 0.1        | -          | -          | -           | -          | -           | -          |
| 66  | nt    | Nonanoic acid                              | 1262        | -          | 0.8        | -          | -          | -           | -          | 2.1         | 3.8        |
| 67  | nt    | (E)-2-Decenal                              | 1263        | 0.5        | 0.7        | 0.6        | 1.4        | 1.7         | 0.8        | 2.2         | 1.6        |
| 68  | nt    | (E)-Cinnamaldehyde                         | 1276        | 8.5        | -          | 0.8        | -          | -           | 2.6        | -           | -          |
| 69  | om    | Isobornyl acetate                          | 1286        | -          | -          | -          | -          | -           | -          | 0.1         | -          |
| 70  | pp    | (E)-Anethole                               | 1290        | 4.1        | -          | -          | 3.4        | 3.9         | 3.1        | 1.3         | -          |
| 71  | nt    | Phenylethanediol                           | 1293        | 0.3        | -          | -          | -          | -           | 0.1        | -           | -          |
| 72  | un    | unidentified                               | 1295        | -          | -          | -          | -          | -           | -          | 0.6         | 0.4        |
| 73  | om    | <b>Carvacrol</b>                           | <b>1302</b> | <b>7.7</b> | <b>6.9</b> | <b>3.2</b> | <b>3.9</b> | <b>4.3</b>  | <b>5.0</b> | <b>1.0</b>  | <b>1.8</b> |
| 74  | nt    | Undecanal                                  | 1307        | -          | 0.1        | -          | 0.1        | 0.1         | -          | 0.2         | 0.2        |
| 75  | nt    | p-Vinyl guaicol                            | 1311        | 0.3        | -          | -          | -          | -           | 0.2        | -           | -          |
| 76  | nt    | (E,E)-2,4-Decadienal                       | 1319        | 0.4        | 0.1        | -          | 0.1        | 0.1         | 0.1        | 2.6         | 4.0        |
| 77  | nt    | 2,9-Dimethyl-5-decyne                      | 1333        | -          | -          | -          | 0.2        | -           | -          | -           | -          |
| 78  | nt    | Methyl 11,14,17-eicosatrienoate            | 1334        | 0.1        | 0.2        | -          | -          | 0.1         | 0.1        | -           | -          |
| 79  | nt    | 3-Nonen-2-one                              | 1339        | -          | 0.2        | -          | 0.3        | 0.2         | 0.1        | -           | -          |
| 80  | om    | $\alpha$ -Terpinyl acetate                 | 1350        | 0.2        | 1          | -          | 1.1        | 1.3         | 0.6        | 0.5         | 0.4        |
| 81  | nt    | n-Decanoic acid                            | 1359        | 0.1        | 0.5        | -          | 0.4        | 0.5         | -          | -           | 0.2        |
| 82  | pp    | Eugenol                                    | 1360        | 2.9        | 0.8        | 0.5        | 0.8        | 0.9         | 1.5        | -           | -          |
| 83  | nt    | (E)-2-Dodecenal                            | 1364        | -          | 0.1        | -          | -          | -           | -          | 0.3         | 0.5        |
| 84  | sh    | $\alpha$ -Ylangene                         | 1372        | 0.1        | 0.2        | -          | 0.3        | -           | -          | -           | 0.3        |
| 85  | sh    | Caryophyllene                              | 1373        | -          | 0.2        | -          | 0.2        | 0.2         | 0.2        | 0.4         | -          |
| 86  | mh    | Geranyl acetate                            | 1375        | -          | 0.1        | -          | 0.1        | 0.1         | -          | -           | 0.5        |
| 87  | sh    | $\alpha$ -Copaene                          | 1376        | 0.1        | 1.1        | 0.2        | 1.3        | 1.4         | 0.7        | 0.6         | -          |
| 88  | om    | $\beta$ -Damascenone                       | 1380        | 0.1        | -          | -          | -          | -           | -          | -           | -          |
| 89  | sh    | (-)- $\beta$ -Elemene                      | 1391        | -          | 0.1        | -          | -          | -           | -          | -           | 0.7        |
| 90  | pp    | Methyleugenol                              | 1397        | 0.5        | 0.6        | -          | 0.6        | 0.8         | 0.5        | 0.3         | -          |
| 91  | nt    | Tetradecane                                | 1399        | -          | 0.1        | 0.3        | 0.1        | 0.1         | -          | 0.3         | 0.2        |
| 92  | sh    | $\beta$ -Ylangene                          | 1414        | -          | -          | -          | 0.1        | 0.1         | -          | 0.2         | -          |
| 93  | os    | <4,8- $\alpha$ -epoxy> Caryophyllene       | 1417        | -          | 0.2        | -          | -          | -           | -          | -           | -          |
| 94  | sh    | <b><math>\beta</math>-Caryophyllene</b>    | <b>1418</b> | <b>1.2</b> | <b>7.5</b> | <b>6.7</b> | <b>8.7</b> | <b>10.1</b> | <b>4.5</b> | <b>10.6</b> | <b>8.1</b> |
| 95  | nt    | 1-Methyl-3-phenylallyl alcohol             | 1421        | -          | -          | -          | -          | -           | -          | 0.2         | -          |
| 96  | sh    | $\beta$ -Deprezenene                       | 1423        | -          | 0.1        | -          | -          | 0.1         | -          | -           | -          |
| 97  | sh    | $\beta$ -Copaene                           | 1428        | -          | 0.1        | -          | -          | -           | -          | -           | 0.6        |
| 98  | sh    | $\gamma$ -Elemene                          | 1433        | -          | 0.2        | -          | -          | 0.2         | -          | 0.3         | -          |
| 99  | sh    | trans- $\alpha$ -Bergamotene               | 1439        | -          | 0.1        | -          | -          | 0.3         | -          | 0.3         | -          |
| 100 | nt    | 5,9-Undecadien-2-one, 6,10-dimethyl-, (Z)- | 1445        | -          | -          | -          | -          | -           | -          | -           | 1.5        |
| 101 | sh    | $\alpha$ -Himachalene                      | 1448        | 0.1        | 0.9        | 0.5        | 0.8        | 1.0         | 0.4        | 1.8         | -          |
| 102 | ac-12 | (E)-Geranyl acetone                        | 1454        | -          | 0.1        | 0.2        | -          | -           | -          | -           | -          |
| 103 | sh    | (+)-Valencene                              | 1454        | -          | 0.2        | 0.2        | 0.2        | -           | 0.1        | 0.5         | 1.8        |
| 104 | sh    | $\alpha$ -Humulene                         | 1455        | -          | 1.1        | 0.7        | 0.8        | 1.1         | 0.5        | 1.2         | 1.2        |
| 105 | sh    | $\gamma$ -Muurolene                        | 1477        | -          | 0.5        | 0.2        | 0.4        | 0.4         | 0.2        | 0.5         | 0.7        |
| 106 | sh    | $\alpha$ -Amorphene                        | 1480        | -          | 0.6        | -          | 0.5        | 0.7         | 0.3        | 0.4         | 0.3        |
| 107 | sh    | Viridiflorene                              | 1493        | -          | 0.1        | -          | -          | -           | -          | -           | -          |
| 108 | sh    | cis- $\beta$ -Guaiene                      | 1494        | -          | 0.9        | -          | 0.5        | 0.6         | 0.2        | 0.3         | -          |
| 109 | sh    | Bicylogermacrene                           | 1494        | -          | -          | -          | -          | -           | -          | -           | 0.2        |
| 110 | sh    | Aromandendrene                             | 1496        | -          | -          | 0.2        | -          | -           | -          | -           | -          |
| 111 | sh    | $\beta$ -Cadinene                          | 1501        | -          | 0.5        | 0.3        | 0.7        | 0.7         | 0.3        | 0.4         | 0.2        |

|                        |                               |                                                         |      |      |      |      |      |      |      |      |      |
|------------------------|-------------------------------|---------------------------------------------------------|------|------|------|------|------|------|------|------|------|
| 112                    | nt                            | Butylated Hydroxytoluene                                | 1503 | 0.2  | -    | -    | 0.1  | 0.1  | -    | -    | -    |
| 113                    | nt                            | 3,5-bis(1,1-dimethylethyl)-Phenol                       | 1504 | -    | 0.1  | -    | -    | -    | -    | -    | -    |
| 114                    | sh                            | $\beta$ -Bisabolene                                     | 1509 | 0.2  | 0.4  | 0.3  | 0.5  | 0.6  | 0.3  | 0.8  | -    |
| 115                    | sh                            | <i>trans</i> - $\gamma$ -Cadinene                       | 1513 | -    | 0.2  | 0.1  | 0.3  | 0.1  | -    | 0.3  | 0.5  |
| 116                    | nt                            | 1,1,4,5,6-Pentamethyl-2,3-dihydro-1H-indene             | 1521 | -    | -    | -    | -    | -    | -    | -    | 0.8  |
| 117                    | sh                            | $\delta$ -Cadinene                                      | 1523 | -    | 0.9  | 0.6  | 1.1  | 1.1  | 0.5  | 2.1  | -    |
| 118                    | sh                            | <i>trans</i> -Calamenene                                | 1525 | -    | -    | -    | -    | -    | -    | 0.3  | 0.3  |
| 119                    | sh                            | $\beta$ -Sesquiphellandrene                             | 1525 | -    | 0.4  | -    | 0.5  | 0.5  | 0.2  | -    | -    |
| 120                    | sh                            | $\alpha$ -Cadinene                                      | 1538 | 0.1  | 0.2  | -    | 0.1  | 0.1  | -    | -    | -    |
| 121                    | sh                            | $\alpha$ -Calacorene                                    | 1542 | -    | 0.2  | -    | 0.2  | 0.2  | -    | 0.2  | 0.2  |
| 122                    | nt                            | Dodecanoic acid                                         | 1555 | -    | 1.2  | -    | 1.1  | 1.2  | 0.3  | 0.2  | -    |
| 123                    | sh                            | Acorenone B                                             | 1561 | -    | 0.8  | 0.7  | 0.8  | 1.0  | 0.4  | 2.1  | 2.0  |
| 124                    | nt                            | Tetradecane, 1-iodo-                                    | 1568 | -    | 0.1  | -    | -    | -    | -    | -    | 0.5  |
| 125                    | os                            | Caryophyllene alcohol                                   | 1570 | 0.1  | 0.9  | 0.4  | 0.9  | 1.0  | 0.5  | 1.0  | 0.6  |
| 126                    | sh                            | (-)-Palustrol                                           | 1570 | -    | -    | -    | -    | -    | -    | -    | 0.2  |
| 127                    | os                            | Caryophyllene oxide                                     | 1581 | -    | 0.1  | -    | 0.1  | 0.2  | -    | -    | 0.5  |
| 128                    | nt                            | Hexadecene                                              | 1590 | -    | 0.2  | 0.1  | 0.2  | 0.2  | -    | 0.3  | -    |
| 129                    | nt                            | Hexadecane                                              | 1600 | -    | 0.1  | 0.2  | 0.1  | 0.1  | 0.1  | 0.1  | -    |
| 130                    | sh                            | Viridiflorol                                            | 1608 | -    | 0.6  | -    | -    | -    | -    | 0.2  | -    |
| 131                    | nt                            | Tetradecanal                                            | 1611 | 0.5  | 0.1  | 0.1  | 0.2  | 0.1  | 0.4  | -    | -    |
| 132                    | sh                            | $\gamma$ -Eudesmol                                      | 1637 | -    | 0.1  | -    | 0.1  | 0.1  | -    | -    | -    |
| 133                    | sh                            | $\alpha$ -Cadinol                                       | 1660 | -    | 0.5  | 0.1  | 0.3  | 0.4  | 0.2  | 0.5  | -    |
| 134                    | sh                            | <i>Ar</i> -Turmerone                                    | 1664 | 0.1  | 0.2  | -    | 0.1  | 0.2  | 0.2  | 0.3  | 0.3  |
| 135                    | nt                            | Methyl tetradecanoate                                   | 1720 | -    | 0.1  | 0.1  | 0.2  | 0.1  | 0.1  | 0.1  | -    |
| 136                    | nt                            | Tetradecanoic acid                                      | 1753 | -    | 0.4  | -    | 0.2  | 0.3  | 0.1  | -    | 0.3  |
| 137                    | nt                            | Octadecane                                              | 1796 | -    | -    | -    | 0.1  | 0.1  | 0.1  | 0.1  | 0.2  |
| 138                    | nt                            | 6,10,14-trimethyl-2-Pentadecanone                       | 1838 | -    | 0.4  | 0.2  | 0.4  | 0.4  | 0.3  | 1.0  | -    |
| 139                    | nt                            | 2-Pentadecanone, 6,10,14-trimethyl-                     | 1840 | -    | -    | -    | -    | -    | -    | -    | 1.2  |
| 140                    | nt                            | 1,2-Benzenedicarboxylic acid, bis(2-methylpropyl) ester | 1856 | -    | 0.1  | -    | -    | -    | -    | -    | -    |
| 141                    | nt                            | 2-Heptadecanone                                         | 1897 | -    | 0.3  | -    | 0.3  | 0.3  | 0.2  | 0.2  | 0.3  |
| 142                    | ac-12                         | Farnesyl acetone                                        | 1907 | -    | 0.4  | 0.2  | 0.5  | 0.5  | 0.2  | 1.0  | 0.9  |
| 143                    | nt                            | Methyl palmitate                                        | 1920 | -    | 2.6  | 1.4  | 3.1  | 3.4  | 1.6  | 1.7  | 1.3  |
| 144                    | dh                            | Cembrene                                                | 1931 | 0.2  | 6.1  | 8.0  | 7.3  | 8.4  | 4.1  | 10.7 | 7.4  |
| 145                    | nt                            | Palmitic acid                                           | 1955 | -    | 9.0  | 2.6  | 8.8  | 9.4  | 6.6  | 3.8  | 2.9  |
| 146                    | nt                            | Ethyl palmitate                                         | 1988 | -    | 0.2  | 0.2  | 0.3  | 0.2  | 0.1  | 0.1  | -    |
| 147                    | ac-10                         | Safranal                                                | 1999 | -    | 0.1  | -    | -    | -    | -    | -    | -    |
| 148                    | nt                            | Methyl linoleate                                        | 2088 | -    | 1.5  | 0.6  | 1.7  | 1.8  | 0.8  | 1.4  | -    |
| 149                    | nt                            | Methyl linolelaidate                                    | 2093 | -    | 1.2  | -    | 0.7  | 0.9  | 0.7  | -    | 0.5  |
| 150                    | nt                            | Methyl elaidate                                         | 2095 | -    | 3.5  | 4.4  | 4.2  | 4.7  | 1.9  | 2.3  | 0.8  |
| 151                    | nt                            | Heneicosane                                             | 2101 | -    | -    | -    | -    | -    | -    | -    | 0.6  |
| 152                    | nt                            | Methyl stearate                                         | 2121 | -    | 0.2  | -    | 0.1  | 0.2  | 0.2  | 0.1  | -    |
| 153                    | nt                            | Oleic Acid                                              | 2134 | -    | 5.8  | -    | 3.5  | 4.4  | 1.5  | -    | -    |
| 154                    | nt                            | Linoleic acid                                           | 2155 | -    | -    | -    | -    | 0.9  | -    | -    | -    |
| 155                    | nt                            | Stearic acid                                            | 2156 | -    | 0.1  | -    | -    | -    | -    | -    | -    |
| 156                    | nt                            | Ethyl Oleate                                            | 2162 | -    | 0.1  | -    | -    | -    | -    | -    | -    |
| 157                    | nt                            | Linoelaidic acid                                        | 2170 | -    | -    | -    | -    | -    | -    | -    | 0.3  |
| 158                    | nt                            | Hexadecanamide                                          | 2174 | -    | 0.3  | -    | 0.1  | -    | -    | -    | -    |
| 159                    | nt                            | <i>n</i> -Tricosane                                     | 2295 | -    | 0.1  | -    | 0.1  | -    | -    | 0.1  | -    |
| 160                    | nt                            | Stearamide                                              | 2382 | -    | 0.2  | -    | -    | -    | -    | -    | -    |
| 161                    | nt                            | <i>n</i> -Pentacosane                                   | 2494 | -    | -    | -    | -    | -    | -    | 0.4  | -    |
| 162                    | nt                            | <i>n</i> -Hexacosane                                    | 2593 | -    | -    | -    | -    | -    | -    | 0.1  | 0.9  |
| 163                    | nt                            | <i>n</i> -heptacosane                                   | 2692 | -    | 0.1  | -    | 0.2  | 0.2  | -    | 1.0  | -    |
| 164                    | nt                            | Squalene                                                | 2806 | -    | 0.1  | -    | -    | -    | 0.2  | -    | -    |
| 165                    | nt                            | <i>n</i> -nonacosane                                    | 2892 | -    | -    | -    | -    | -    | -    | 0.5  | -    |
| Total identified (%)   |                               |                                                         |      | 98.7 | 97.1 | 98.8 | 94.7 | 96.7 | 89.3 | 95.5 | 92.4 |
| Class of compounds (%) |                               |                                                         |      | EO-1 | EO-2 | EO-3 | EO-4 | EO-5 | EO-6 | EO-7 | EO-8 |
| mh                     | monoterpene hydrocarbons (mh) |                                                         |      | 0.2  | 0.3  | 2.5  | 0.1  | 0.2  | 0.3  | 0.3  | 1.5  |

|       |                                  |             |             |             |             |             |             |             |             |
|-------|----------------------------------|-------------|-------------|-------------|-------------|-------------|-------------|-------------|-------------|
| om    | oxygenated monoterpenes (om)     | 16.1        | 18.5        | 8.2         | 16.5        | 18.8        | 14.2        | 9.0         | 9.1         |
|       | <b>Total monoterpenes</b>        | <b>16.3</b> | <b>18.8</b> | <b>10.7</b> | <b>16.6</b> | <b>19</b>   | <b>14.5</b> | <b>9.3</b>  | <b>10.6</b> |
| sh    | sesquiterpenes hydrocarbons (sh) | 1.9         | 18.9        | 10.8        | 18.5        | 21.2        | 9.2         | 24.3        | 17.7        |
| os    | oxygenated sesquiterpenes (os)   | 0.1         | 1.2         | 0.4         | 1.0         | 1.2         | 0.5         | 1.0         | 1.1         |
|       | <b>Total sesquiterpenes</b>      | <b>2.0</b>  | <b>20.1</b> | <b>11.2</b> | <b>19.5</b> | <b>22.4</b> | <b>9.7</b>  | <b>25.3</b> | <b>18.8</b> |
| dh    | diterpene                        | 0.2         | 6.1         | 8.0         | 7.3         | 8.4         | 4.1         | 10.7        | 7.4         |
| ac-10 | apocarotenoids (ac-10)           | -           | 0.1         | -           | -           | -           | -           | -           | -           |
| ac-12 | apocarotenoids (ac-12)           | -           | 0.1         | 0.2         | -           | -           | -           | -           | -           |
| nt    | <b>non terpenes (nt)</b>         | <b>72.7</b> | <b>50.5</b> | <b>68.2</b> | <b>46.5</b> | <b>41.3</b> | <b>55.9</b> | <b>48.6</b> | <b>55.6</b> |
| pp    | phenylpropanoids (pp)            | 7.5         | 1.4         | 0.5         | 4.8         | 5.6         | 5.1         | 1.6         | -           |
|       | <b>Total identified (%)</b>      | <b>98.7</b> | <b>97.1</b> | <b>98.8</b> | <b>94.7</b> | <b>96.7</b> | <b>89.3</b> | <b>95.5</b> | <b>92.4</b> |

<sup>a</sup>LRI: Linear Retention Index on a DB5 column (NIST-2017), #Samples of Sumac were collected from the different location and local market from Jordan. Sample 1 (Amman, Downtown), Sample 3 (Amman City), Sample 4 (city Mall), Sample 5 (Al-Fuheis) and Sample 8 (Al-salt City). Sample 2 (Ajloun Forest Reserve), Sample 6 (Al-Salt field) and Sample 7 (Al-Fuheis field).
